# Supplementary material for: Brought in dead cases to a tertiary referral paediatric emergency department in India: a prospective qualitative study
Source: PubMed Central journal article supplement — BMJ Paediatr Open. 2020 Feb 12;4(1):e000606. doi: 10.1136/bmjpo-2019-000606 (PMC7047481; doi:10.1136/bmjpo-2019-000606), 2020-02-12
Supplement: bmjpo-2019-000606supp001.pdf [file bmjpo-2019-000606supp001.pdf]

**Brought in dead cases to a tertiary referral pediatric Emergency Department in India: a prospective qualitative study**

Date: .... /..... /..... Time: ... : ... hours

Interviewer:

Main respondent's relationship to the child:

Language of the interview:

Educational status of the respondent:

Are there other people present at the interview? If yes, their relationship:

Enrol No.

CR No.

Address: \_\_\_\_\_

\_\_\_\_\_

Mobile No. \_\_\_\_\_

- Age: years      month      days      hours
- Date of birth- \_\_\_/\_\_\_/\_\_\_ Time of birth:      :      hrs
- Sex:      Male      Female
- Order of birth:
 

|   |   |   |   |   |
|---|---|---|---|---|
| 1 | 2 | 3 | 4 | 5 |
|---|---|---|---|---|
- Religion:
 

Hindu /Muslim / Sikh / Christian/Others
- Socioeconomic status: (modified Kuppuswamy scale)
 

Education of head of family: (score)      Highest education of parents:

Occupation of head of family: (score)

Monthly income of family: (score)
- Does the family have a BPL (Below Poverty Line) card: Yes / No
- Immunization status: (as per National Immunization Schedule)
 

.....

Fully immunized / Partial / Unimmunized
- Weight:      Kg      Grams

**Birth details (Neonates)**

Born to G.....P.....

Gestation..... Weeks (on time / early / late / don't know)

Place of delivery: Home  Hospital 

## Type of Hospital

Nursing home / PHC - Pediatrician availability District hospital/Multispecialty hospital State medical college / PGIMER 

## Delivery attended by

Untrained Dai / Trained Dai / Nurse / Obstetrician / Others

## Mode of Delivery

Vaginal Delivery: Normal  
Instrumental deliveryLSCS: Elective  
Emergency

How much time did the labour and delivery take?.....

Were you informed about drugs to induce labour?.....

Cried immediately after birth: Yes/Weak /No/Don't Know

Able to suckle after birth: Normal/Weak/No/Don't Know

Apgar score (from referral note): 1 minute..... 5 minute..... 10 minute.....

Any Resuscitation: Yes/No Description /details if available.....

.....

- **Description of illness** (open ended, unprompted)

Prompt: was there anything else?

What was the length of time the child was ill? .....

- **Disease related Symptoms during illness**

During the illness, did she/he have

|                       |                   |          |
|-----------------------|-------------------|----------|
| Refusal to feed       | Yes/No/Don't Know | duration |
| Fever                 | Yes/No/Don't Know | duration |
| Loose stools          | Yes/No/Don't Know | duration |
| Vomiting              | Yes/No/Don't Know | duration |
| Fast breathing        | Yes/No/Don't Know | duration |
| Cough                 | Yes/No/Don't Know | duration |
| Chest indrawing       | Yes/No/Don't Know | duration |
| Noisy breathing       | Yes/No/Don't Know | duration |
| Seizures              | Yes/No/Don't Know | duration |
| Bulging fontanelle    | Yes/No/Don't Know | duration |
| Altered consciousness | Yes/No/Don't Know | duration |
| Malformation          | Yes/No/Don't Know |          |
| Complicated delivery  | Yes/No/Don't Know |          |
| Born early            | Yes/No/Don't Know |          |
| Very small at birth   | Yes/No/Don't Know |          |
| any other symptoms    |                   |          |
| Specify .....         |                   | duration |

Referred case :  Discontinued care at other hospital:  Came from home

Total number of contacts with health care systems /health care providers since the onset of illness and details:

Names and addresses of the referring hospitals:

.....

Date & time of admission:                      Date & time of referral:                      Duration of stay:

.....

Date & time of admission:                      Date & time of referral:                      Duration of stay:

.....

Date & time of admission:                      Date & time of referral:                      Duration of stay:

Treatment received at the referring facility: (Narrative)

.....

.....

.....

Pre-referral communication: Yes /No                      Referral note: Yes / No

Referral diagnosis: *Information from parents:*                      *From Referral note:*

Referral information: Complete / Incomplete – Details mentioned:

(Referral document checklist)

- HR:                      /min                      Not Mentioned
- RR:                      /min                      Not Mentioned
- BP:    ...../..... mmHg                      Not Mentioned
- If hypotensive whether fluid bolus: Yes / No                      Inotropes    Yes / No
- If in respiratory distress/failure whether on: Supplemental O<sub>2</sub> / CPAP / PPV\_ BMV/IMV
- SpO<sub>2</sub>    %
- Consciousness / GCS    E    V    M                      Not Mentioned
- Pupil:                      size                      reaction                      Not Mentioned
- Blood glucose                      Not Mentioned
- Any other important finding
- Treatment given:                      Not Mentioned
- Drugs:                      Blood components:

- Reason for referral to PGIMER?

.....

Severity of illness

Need for critical care expertise

Failure of treatment

Nonavailability of doctors

Financial constraints

Others (specify).....

- Duration between first communication on decision of referral and actual referral time:

Immediately (within 2 hrs)

Some delay (within 2-4 hrs)

Great delay (within 4-6 hrs)

Severe delay (>6 hrs)

Reason for delay.....

.....

- Mode of transport used to reach PGIMER (Tick the appropriate)

Hospital referral services / Ambulance

Own Vehicle

Car / Scooter / Bike / Others

Private hire

Taxi / Auto rickshaw

Public transport system

Bus / Train

- If by ambulance whether it was equipped with

a. Oxygen Y/N

b. Multiparameter monitor Y/N

c. Resuscitation equipment / drugs Y/N

d. Accompanied by a doctor or para-medical staff: Y/N

- Any deterioration noted during transport: Y/N

If yes, describe.....

- Worsening of sensorium/loss of consciousness
- Seizure
- Gasping/Worsening of breathing
- Fall in blood pressure / loss of pulse
- Fall in oxygen saturation
- Tachycardia / Bradycardia

If yes what was done to treat? Describe the intervention

.....  
 .....

(Oxygen, Fluids, Drugs, Bag ventilation, Chest compression)

- Travel distance: (From the point of referral to PGIMER) in Kms  
 .....
- Time taken to reach PGIMER from the point of referral (Time of start to arrival time in ED) .....
- Perceived delay in transport?
- If yes, reasons

.....  
 .....

### **Triage details at PGIMER**

Date & Time of admission:

### **Physiological Categorization:**

Cardiorespiratory failure

Cardiorespiratory arrest

**CPR**

**ROSC**

**Final diagnosis**
